# Supplementary material
Source: HighWire-hosted journal article supplement (https://diabetes.diabetesjournals.org/content/suppl/2005/02/28/54.3.720)

**A**

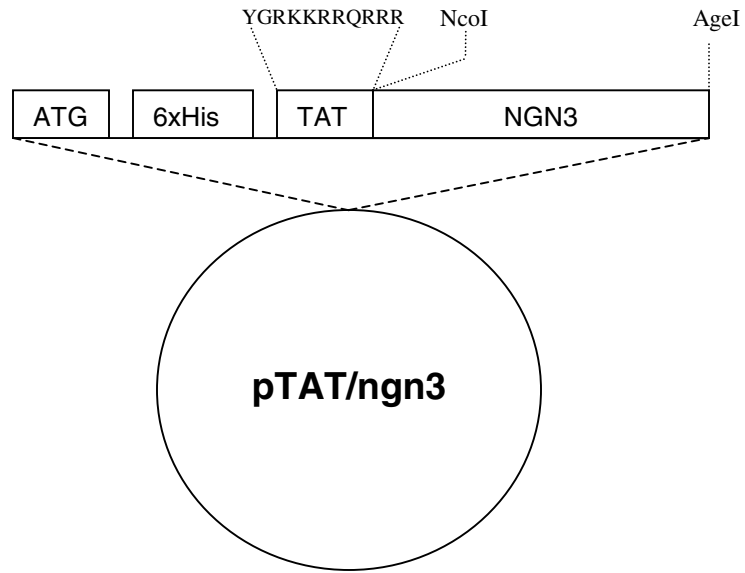

**B**

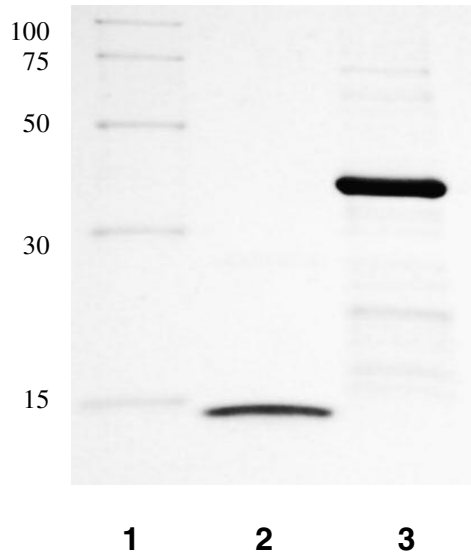

**C**

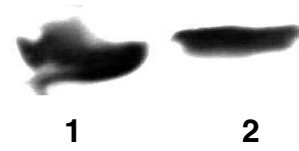

Supplement: Pg720Supplement.pdf [file Pg720Supplement.pdf]
